# Supplementary material
Source: PubMed Central journal article supplement (PMC4109288)

I.

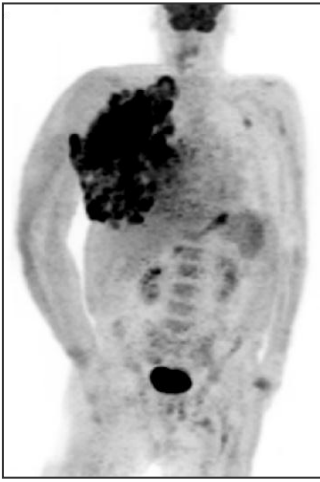

Baseline

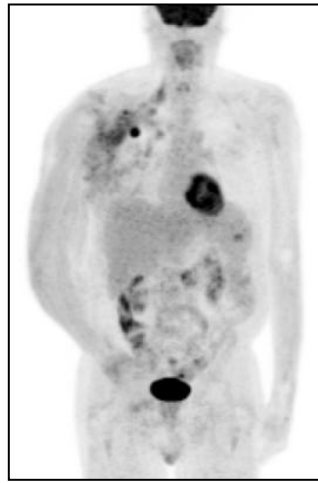

Day 15

II.

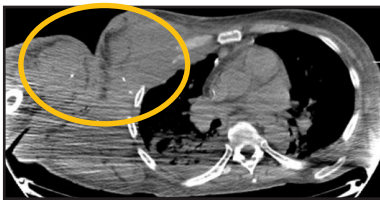

Baseline

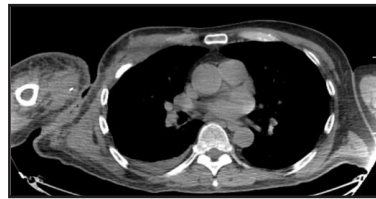

Week 6

III.

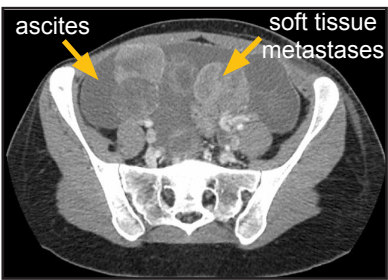

Baseline

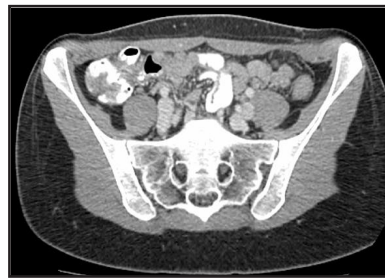

Week 14

IV.

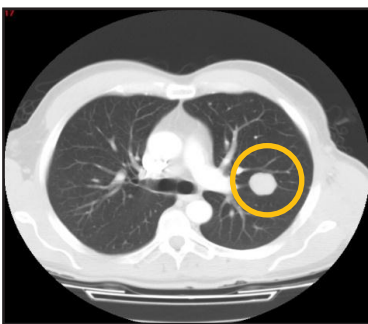

Baseline

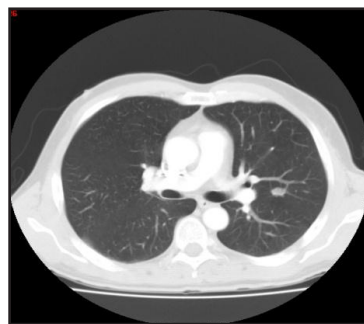

Week 36

Supplement: NIHMS603732-supplement-Fig_S1.pdf [file NIHMS603732-supplement-Fig_S1.pdf]

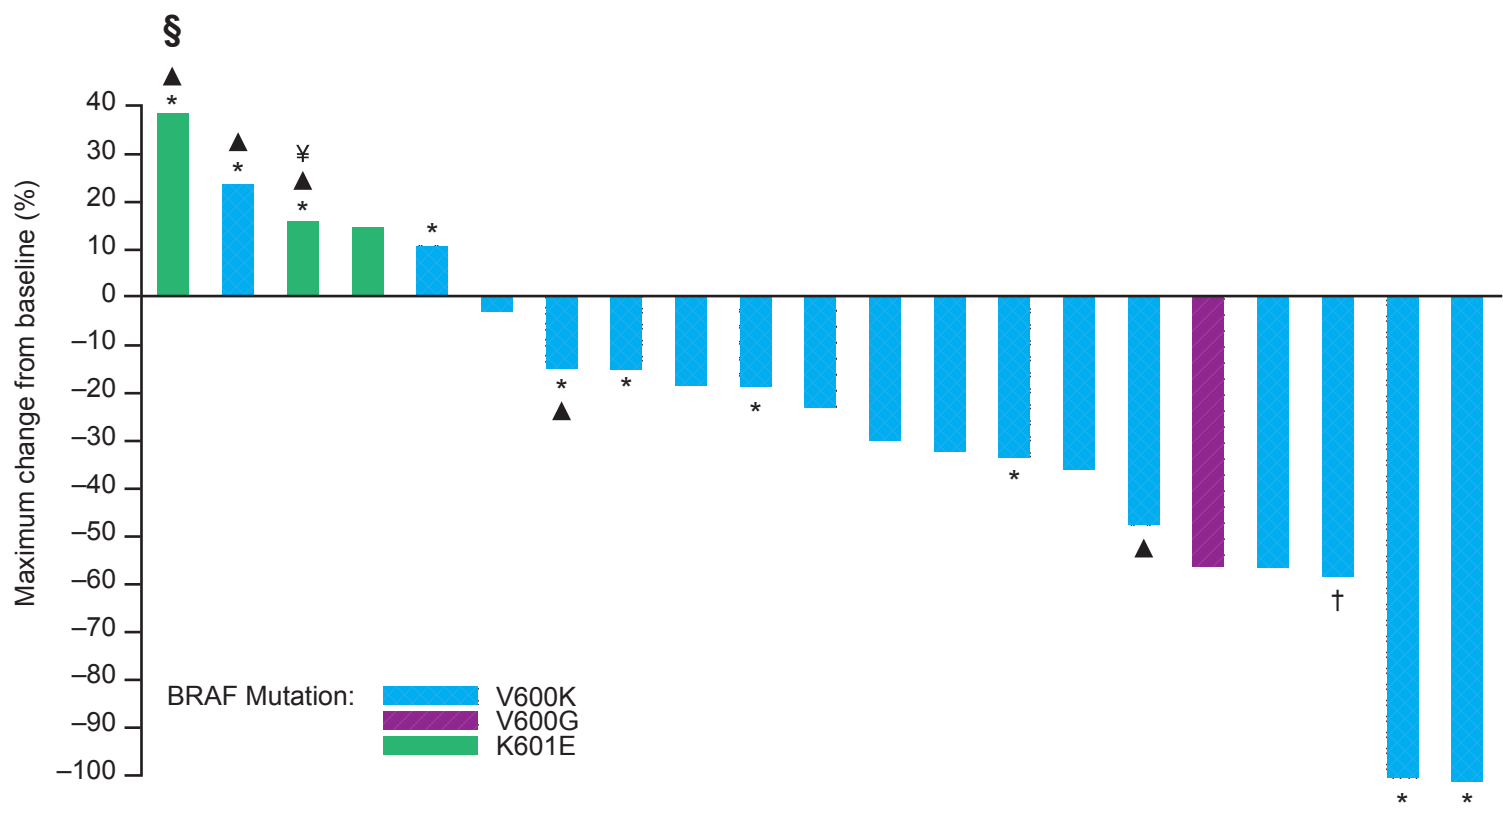

Supplement: NIHMS603732-supplement-Fig_S2.pdf [file NIHMS603732-supplement-Fig_S2.pdf]

I. multiple liver metastases

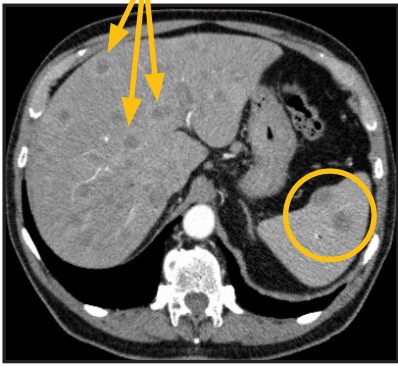

Baseline

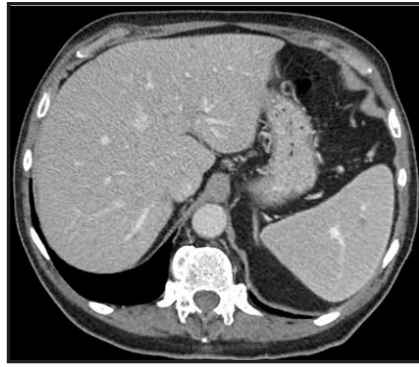

Week 6

II.

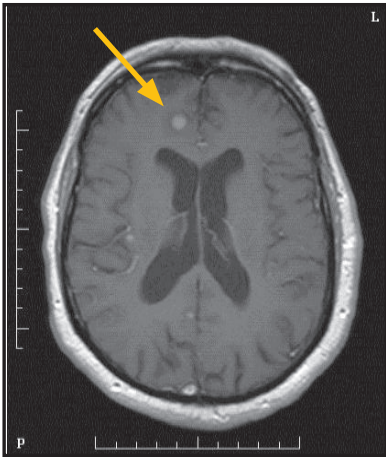

Baseline

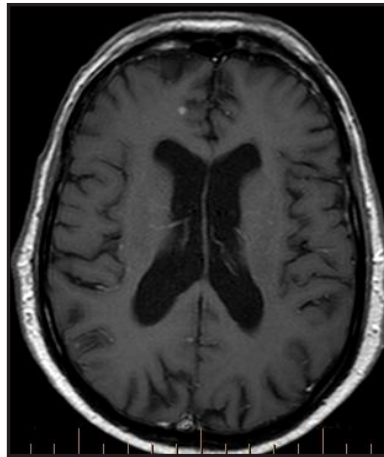

Week 6

Supplement: NIHMS603732-supplement-Fig_S3.pdf [file NIHMS603732-supplement-Fig_S3.pdf]

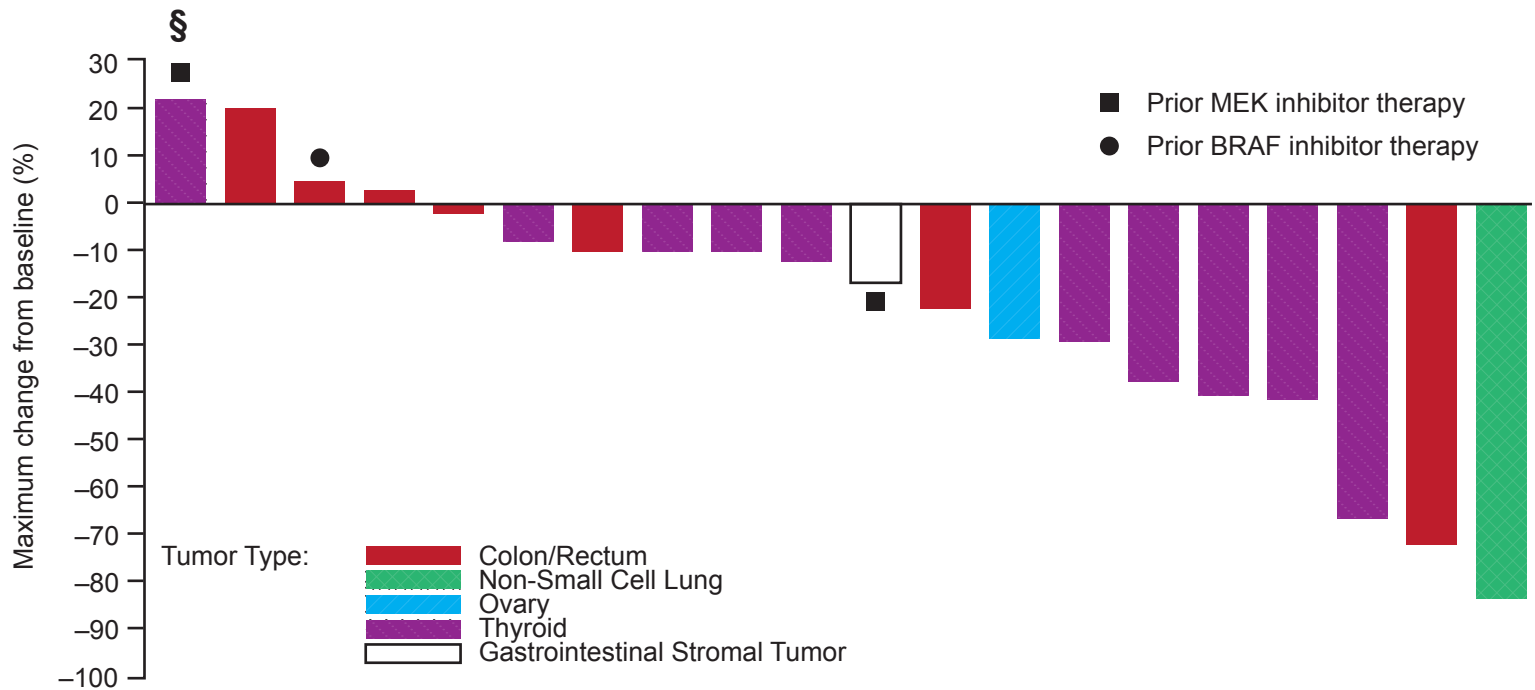

Supplement: NIHMS603732-supplement-Fig_S4.pdf [file NIHMS603732-supplement-Fig_S4.pdf]

I.

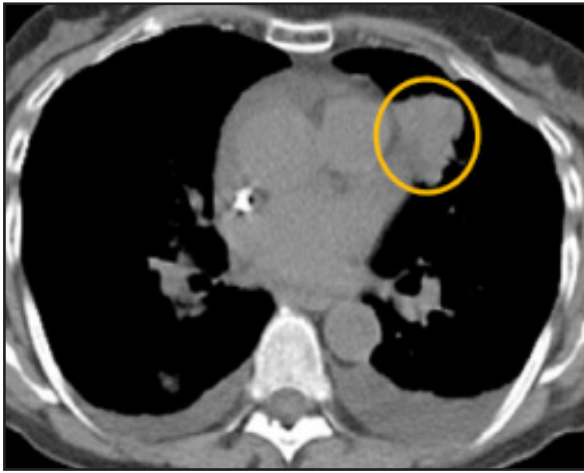

Baseline

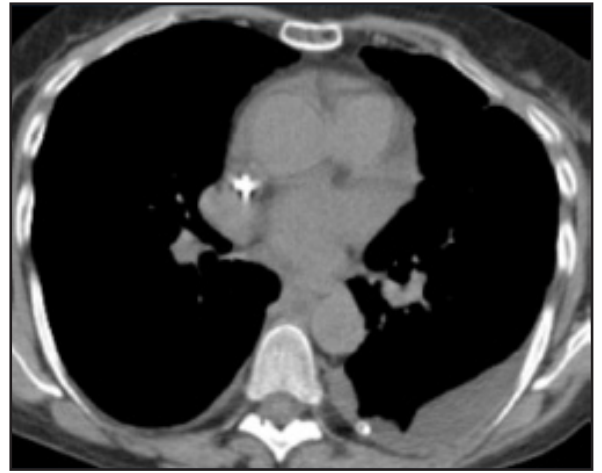

Week 15

II.

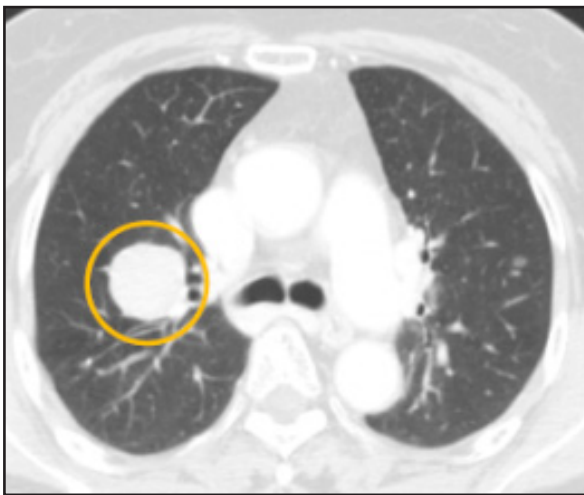

Baseline

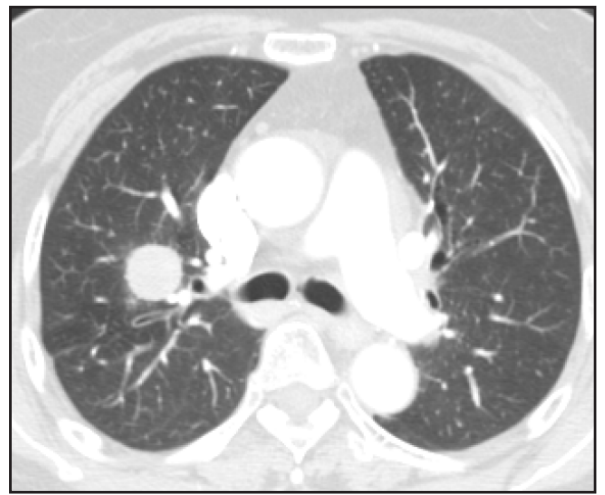

Week 9

III.

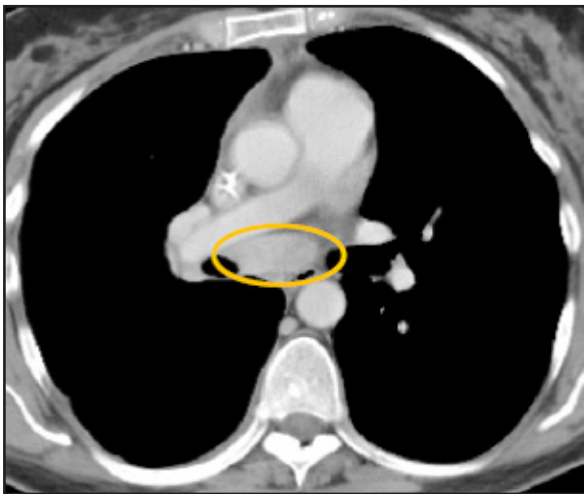

Baseline

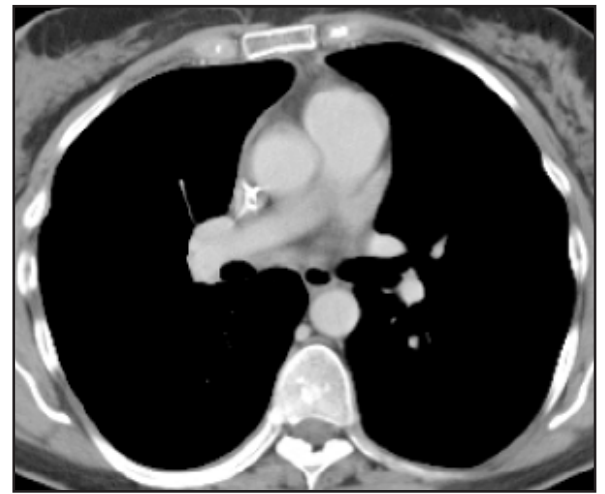

Week 6

Supplement: NIHMS603732-supplement-Fig_S5.pdf [file NIHMS603732-supplement-Fig_S5.pdf]
